# Supplementary material for: Effect of Excitation Wavelength on Optical Performances of Quantum-Dot-Converted Light-Emitting Diode
Source: MDPI journal article supplement (doi:10.3390/nano9081100), 2019-08-01
Supplement: s1 [file s1]

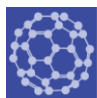

Supporting information

# Effect of Excitation Wavelength on Optical Performances of Quantum-Dot-Converted Light-Emitting Diode

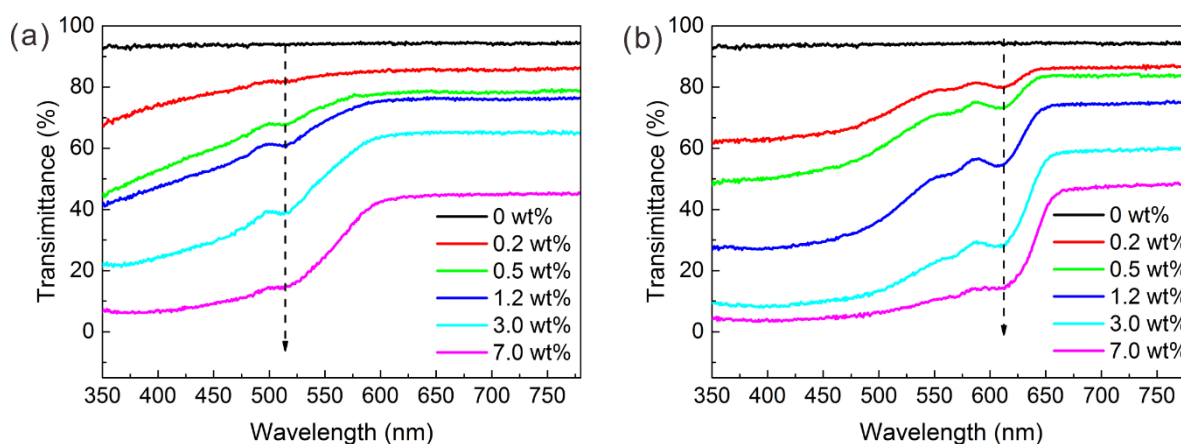

Figure S1. Transmission spectrum of (a) GQD and (b) RQD film.

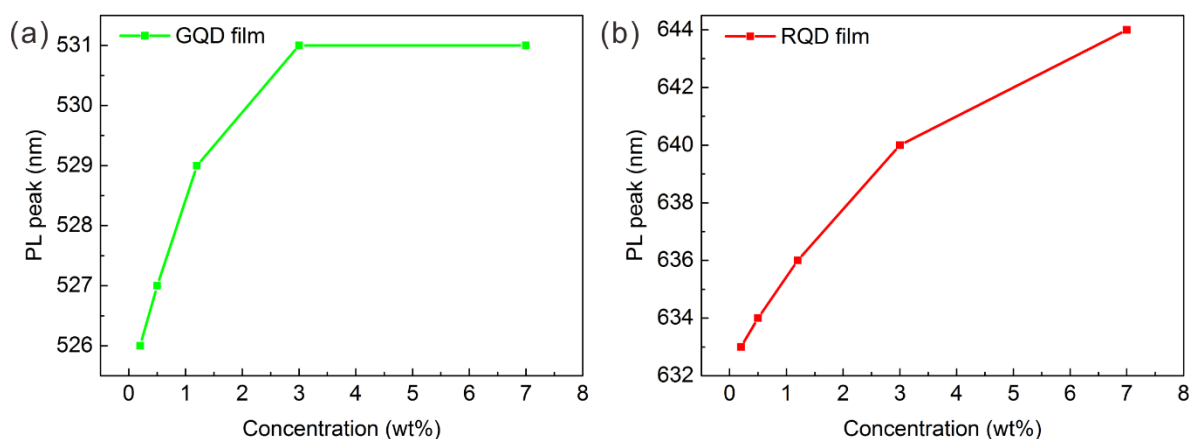

Figure S2. PL shift phenomenon of (a) GQD film and (c) RQD film.

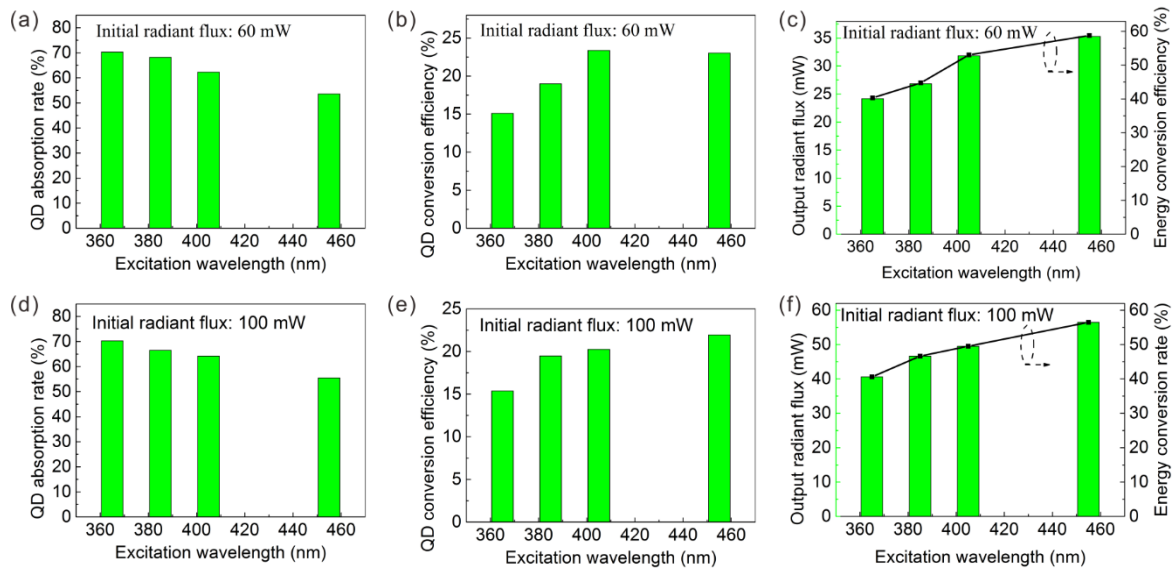

**Figure S3.** (a,d) QD absorption rate; (b,e) QD conversion efficiency; (c,f) output radiant flux and energy conversion efficiency under 60- and 100-mW incident radiant flux.

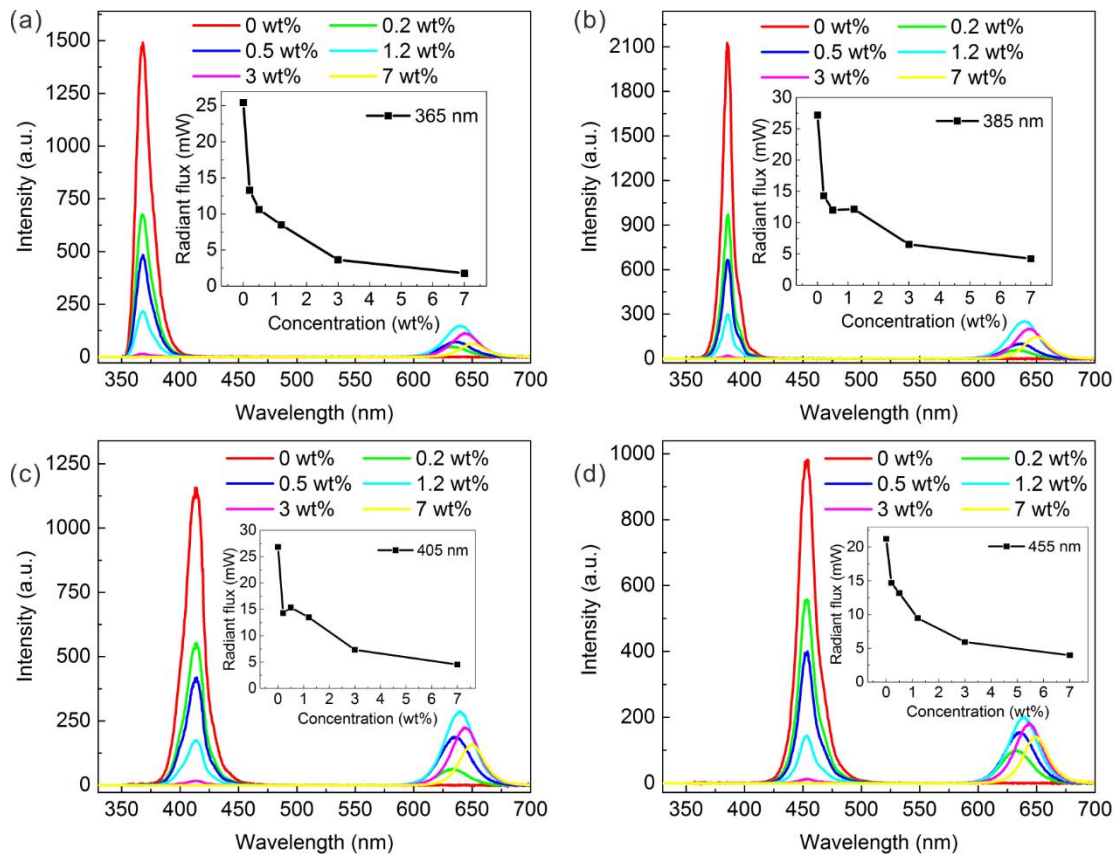

**Figure S4.** Electroluminescence (EL) spectrum of RQD LED with (a) 365 nm, (b) 385 nm, (c) 405 nm, and (d) 455-nm LED chip excitation wavelength under 20 mA. Inset graph shows radiation flux vs. RQD concentration.

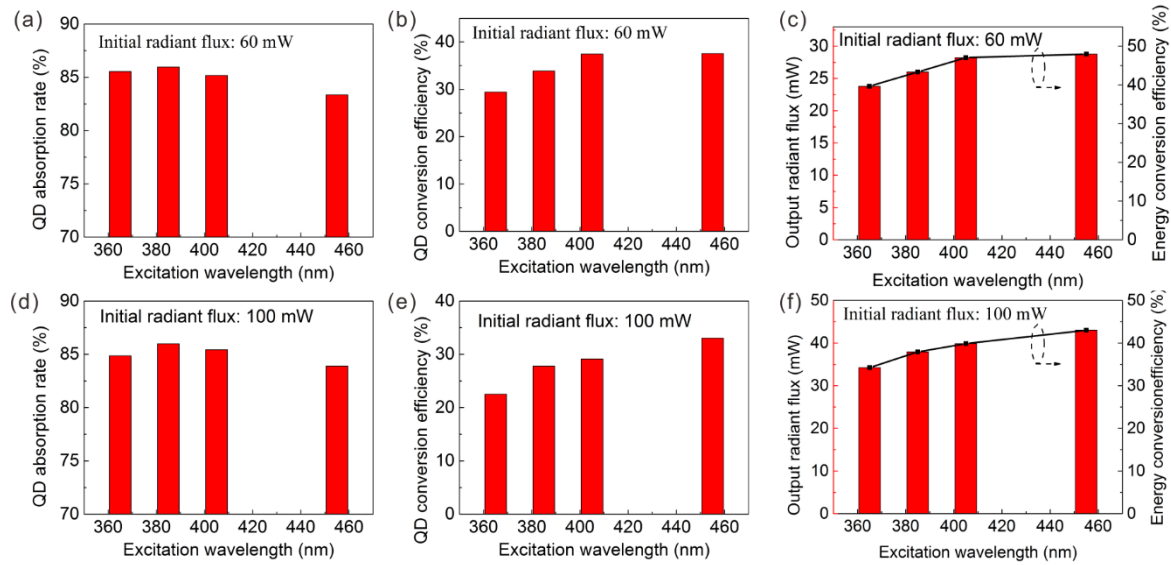

**Figure S5.** (a)(d) RQD absorption rate; (b) (e) RQD conversion efficiency; (c) (f) output radiant flux and energy conversion efficiency under 60- and 100-mW incident radiant flux.

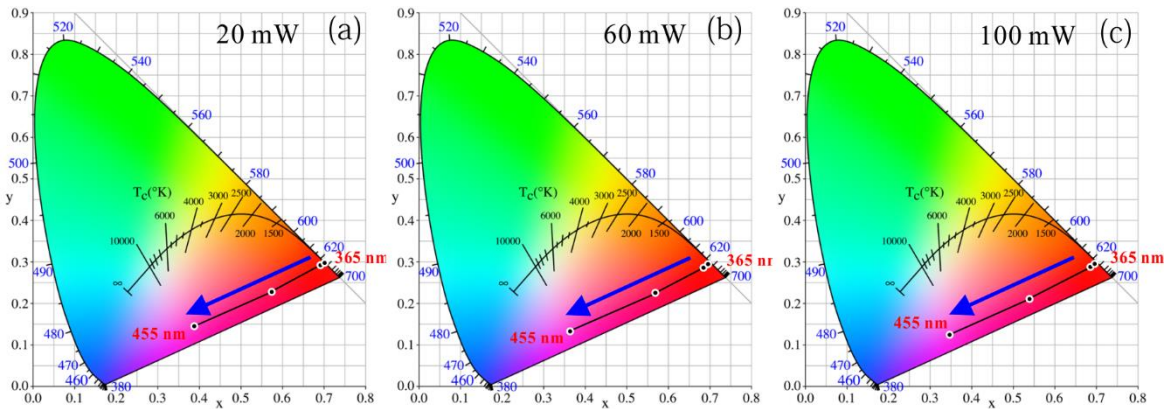

**Figure S6.** Chromaticity diagram of RQD LED with different excitation wavelengths under equal incident radiant fluxes such as (a) 20 mW, (b) 60 mW, and (c) 100 mW.
